# Supplementary material for: Injury incidence and characteristics for elite, male, artistic USA gymnastics competitions from 2008 to 2018
Source: HighWire-hosted journal article supplement (doi:10.1136/bjsports-2019-101297), 2020-10-14
Supplement: bjsports-2019-101297supp003_data_supplement.xlsx [file bjsports-2019-101297supp003_data_supplement.xlsx]

## Sheet: Table 3
Supplemental Table 3. Number and Percentage of Injuries According to Location and Type
Injury Type x Location	Arthritis, synovitis, bursitis		Concussion		Contusion, hematoma		Dislocation, subluxation		Fracture		Hyperextension injury		Impingement		Laceration, abrasion, skin lesion		Lesion of meniscus or cartilage		Ligament rupture		Ligament sprain		Medical illness		Muscle cramp/spasm		Nerve injury, spinal cord injury		Other		Other bone injury		Strain, muscle rupture, tear		Tendinopathy		Tendon rupture		All
	# Injuries	% Total Inj	# Injuries	% Total Inj	# Injuries	% Total Inj	# Injuries	% Total Inj	# Injuries	% Total Inj	# Injuries	% Total Inj	# Injuries	% Total Inj	# Injuries	% Total Inj	# Injuries	% Total Inj	# Injuries	% Total Inj	# Injuries	% Total Inj	# Injuries	% Total Inj	# Injuries	% Total Inj	# Injuries	% Total Inj	# Injuries	% Total Inj	# Injuries	% Total Inj	# Injuries	% Total Inj	# Injuries	% Total Inj	# Injuries	% Total Inj	# Injuries	% Total Inj
Abdomen	0	0	0	0	0	0	0	0	0	0	0	0	0	0	0	0	0	0	0	0	0	0	0	0	0	0	0	0	0	0	0	0	1	0.00529101	0	0	0	0	1	0.00529101
Achilles tendon	0	0	0	0	0	0	0	0	0	0	0	0	0	0	0	0	0	0	0	0	0	0	0	0	0	0	0	0	0	0	0	0	0	0	1	0.00529101	2	0.010582	3	0.015873
Ankle	0	0	0	0	6	0.031746	0	0	1	0.00529101	0	0	1	0.00529101	0	0	0	0	0	0	20	0.10582	0	0	0	0	0	0	0	0	0	0	7	0.037037	0	0	0	0	35	0.185185
Chest	0	0	0	0	0	0	0	0	0	0	0	0	0	0	0	0	0	0	0	0	0	0	0	0	0	0	0	0	0	0	0	0	3	0.015873	0	0	0	0	3	0.015873
Elbow	0	0	0	0	1	0.00529101	0	0	0	0	0	0	1	0.00529101	0	0	0	0	0	0	0	0	0	0	0	0	0	0	0	0	0	0	2	0.010582	0	0	0	0	4	0.021164
Face	0	0	0	0	2	0.010582	0	0	0	0	0	0	0	0	3	0.015873	0	0	0	0	0	0	0	0	0	0	0	0	2	0.010582	0	0	0	0	0	0	0	0	7	0.037037
Foot/Toe	0	0	0	0	4	0.021164	0	0	0	0	0	0	0	0	0	0	0	0	0	0	3	0.015873	0	0	0	0	0	0	0	0	0	0	2	0.010582	0	0	0	0	9	0.047619
Forearm	0	0	0	0	1	0.00529101	0	0	1	0.00529101	0	0	0	0	0	0	0	0	0	0	0	0	0	0	0	0	0	0	0	0	0	0	0	0	0	0	0	0	2	0.010582
Hand/Finger	0	0	0	0	1	0.00529101	1	0.00529101	1	0.00529101	0	0	0	0	0	0	0	0	0	0	6	0.031746	0	0	0	0	0	0	0	0	0	0	1	0.00529101	0	0	0	0	10	0.0529101
Head	0	0	12	0.0634921	0	0	0	0	0	0	0	0	0	0	0	0	0	0	0	0	0	0	0	0	0	0	0	0	0	0	0	0	0	0	0	0	0	0	12	0.0634921
Hip/Groin	0	0	0	0	0	0	0	0	0	0	0	0	0	0	0	0	0	0	0	0	0	0	0	0	0	0	0	0	0	0	0	0	5	0.026455	0	0	0	0	5	0.026455
Knee	1	0.00529101	0	0	6	0.031746	0	0	0	0	5	0.026455	0	0	0	0	0	0	4	0.021164	7	0.037037	0	0	0	0	0	0	0	0	0	0	5	0.026455	1	0.00529101	0	0	29	0.153439
Lower back	0	0	0	0	0	0	0	0	0	0	0	0	0	0	0	0	0	0	0	0	0	0	0	0	1	0.00529101	1	0.00529101	0	0	0	0	8	0.042328	0	0	0	0	10	0.0529101
Lower leg	0	0	0	0	1	0.00529101	0	0	1	0.00529101	0	0	0	0	0	0	0	0	0	0	0	0	0	0	0	0	0	0	0	0	1	0.00529101	3	0.015873	0	0	0	0	6	0.031746
Medical illness	0	0	0	0	0	0	0	0	0	0	0	0	0	0	0	0	0	0	0	0	0	0	8	0.042328	0	0	0	0	0	0	0	0	0	0	0	0	0	0	8	0.042328
Neck	0	0	0	0	0	0	0	0	2	0.010582	0	0	0	0	0	0	0	0	0	0	0	0	0	0	0	0	0	0	0	0	0	0	10	0.0529101	0	0	0	0	12	0.0634921
Shoulder/Clavicle	0	0	0	0	0	0	1	0.00529101	0	0	0	0	1	0.00529101	0	0	1	0.00529101	0	0	2	0.010582	0	0	0	0	0	0	0	0	0	0	7	0.037037	3	0.015873	0	0	15	0.0793651
Sternum/ribs	0	0	0	0	0	0	0	0	0	0	0	0	0	0	0	0	0	0	0	0	1	0.00529101	0	0	0	0	0	0	0	0	0	0	0	0	0	0	0	0	1	0.00529101
Thigh	0	0	0	0	0	0	0	0	0	0	0	0	0	0	0	0	0	0	0	0	0	0	0	0	0	0	0	0	0	0	0	0	3	0.015873	0	0	0	0	3	0.015873
Upper arm	0	0	0	0	1	0.00529101	0	0	0	0	0	0	0	0	0	0	0	0	0	0	0	0	0	0	0	0	0	0	0	0	0	0	1	0.00529101	0	0	0	0	2	0.010582
Upper back	0	0	0	0	0	0	0	0	0	0	0	0	0	0	0	0	0	0	0	0	0	0	0	0	1	0.00529101	0	0	0	0	0	0	0	0	0	0	0	0	1	0.00529101
Wrist	0	0	0	0	1	0.00529101	0	0	1	0.00529101	0	0	2	0.010582	0	0	0	0	0	0	4	0.021164	1	0.00529101	0	0	0	0	0	0	0	0	2	0.010582	0	0	0	0	11	0.0582011
Grand Total	1	0.00529101	12	0.0634921	24	0.126984	2	0.010582	7	0.037037	5	0.026455	5	0.026455	3	0.015873	1	0.00529101	4	0.021164	43	0.227513	9	0.047619	2	0.010582	1	0.00529101	2	0.010582	1	0.00529101	60	0.31746	5	0.026455	2	0.010582	189	1
